# Supplementary material
Source: PubMed Central journal article supplement (PMC3321631)
Supplement: cdd2011193x2.pdf [file cdd2011193x2.pdf]

## Supplementary figure 2 Paul et al.

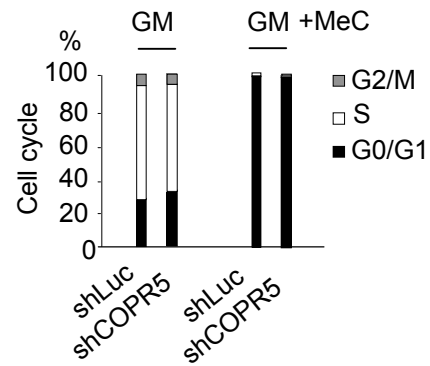

### **Methylcellulose-induced cell cycle arrest is equivalent in control and *COPR5*-silenced C2C12 cells**

The experiment was performed as described<sup>2</sup>. The percentage of the cells in the different cell cycle phases shown was quantified by FACS after BrdU incorporation in sh*LUC* and sh*COPR5* C2C12 cells maintained in growth proliferating medium (GM) or G0-arrested in GM in the presence of methylcellulose (+MeC).
