# Supplementary material
Source: PubMed Central journal article supplement (PMC3321631)
Supplement: cdd2011193x4.pdf [file cdd2011193x4.pdf]

## Supplementary figure 4 Paul et al.

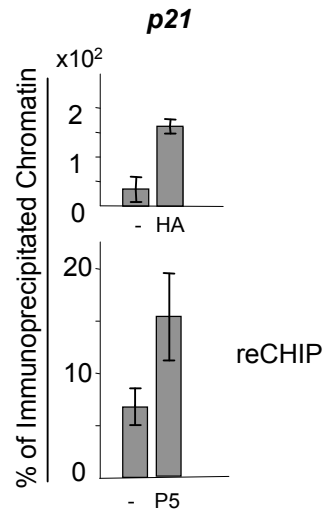

### **COPR5 and PRMT5 are detected as part of a same complex on the *p21* promoter**

Chromatin immunoprecipitation was performed using C2C12 cells that express HA-COPR5 at D1, the optimal time point to observe the recruitment of PRMT5 at the *p21* promoter. A reCHIP was performed with an anti-PRMT5 antibody from the eluted fraction of a first chromatin immunoprecipitation performed with an anti-HA antibody. Values are expressed as a percentage of immunoprecipitated chromatin compared to input. Of note, in the reCHIP, input corresponds to the eluted chromatin that was immunoprecipitated with the anti-HA antibody.
