# Supplementary material
Source: PubMed Central journal article supplement (PMC3321631)
Supplement: cdd2011193x5.pdf [file cdd2011193x5.pdf]

## Supplementary figure 5 Paul et al.

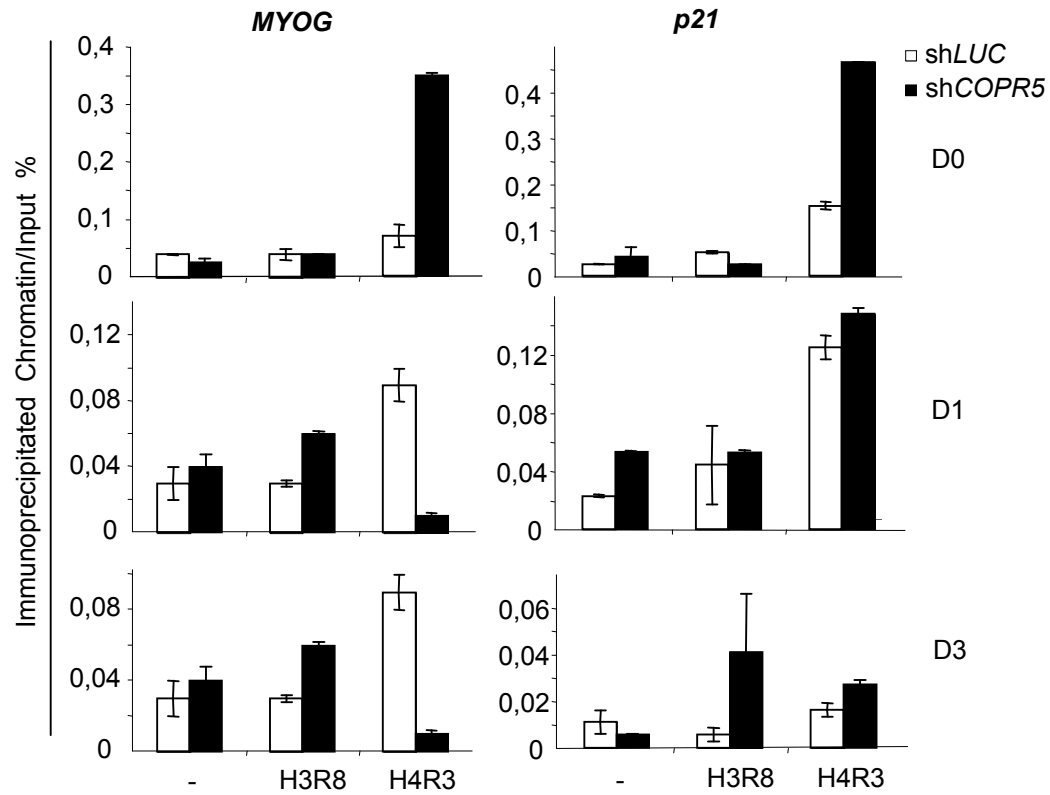

### Analysis of the PRMT5-mediated methylation on histones from shLUC- and shCOPR5-infected cells

Chromatin immunoprecipitation was performed as in Figure 4b using anti-H4R3me2s and anti-H3R8me2s antibodies. Analysis on the *p21* and *MYOG* gene promoters are shown. Values are expressed as a percentage of immunoprecipitated chromatin relative to the input and represent the means of two independent experiments.
