# Supplementary material
Source: PubMed Central journal article supplement (PMC3321631)
Supplement: cdd2011193x6.pdf [file cdd2011193x6.pdf]

## Supplementary figure 6 Paul et al.

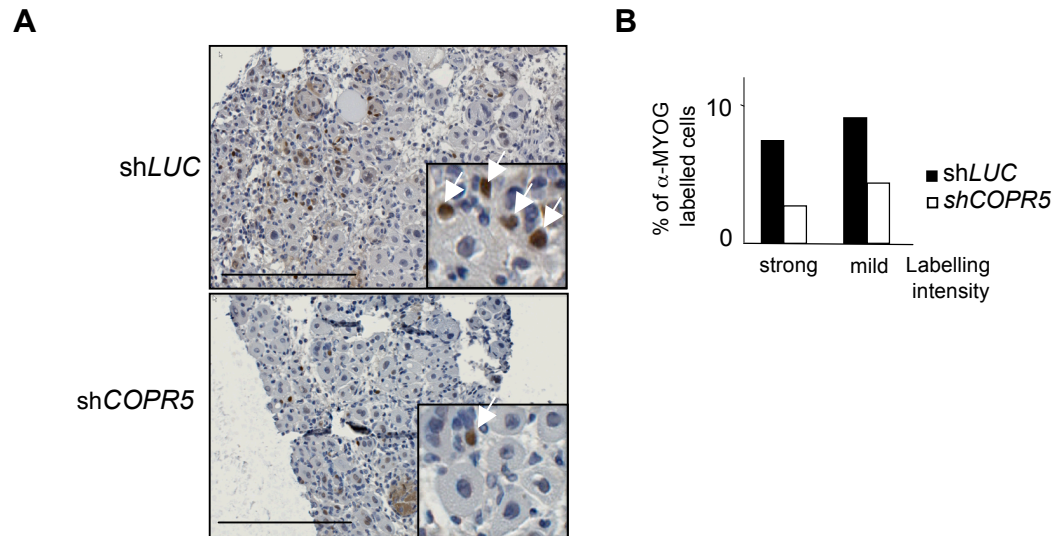

### **Immunohistochemistry staining of MYOG on sections of CTX-treated muscle electroporated with control and COPR5 shRNA encoding plasmids.**

(A) Immuno-histochemical analysis using an  $\alpha$ -MYOG antibody on muscle sections performed at D5 showed less myofibres stained in COPR5 knocked down cells compared to control cells. Bars : 200  $\mu$ m. A higher magnification of the staining is shown. (B) Quantification of the  $\alpha$ -MYOG antibody labelling was performed on muscle sections and expressed as a percentage of strongly- and mildly- labelled cells relative to the total number of counted cells. The percentage of non-labelled cells is not indicated. (shLUC: n=312, shCOPR5: n=370)
