# Supplementary material
Source: PubMed Central journal article supplement (PMC3321631)
Supplement: cdd2011193x7.pdf [file cdd2011193x7.pdf]

## SUPPLEMENTARY INFORMATION

### Material and Methods

The sequences of the mouse *COPR5* sh1, sh2 and sh3 RNAs used in Fig1 and Fig.S1 are:

5' sh1s 244-262: GCTTTGCAGTGGAGAAGGA

5' sh2s 379-397: GAAATCCTTACGATGCTGA

5' sh3s 659-677: GACTCCTCAGTGTGG GCTA

The sequence of the human *COPR5* shRNA used in Fig1 is

5' sh 764-782: CAGTCTGTTGTTGTTCTTA

Sequence of the oligonucleotides used for RTqPCR:

*MHC* mouse 5'f GAGATGGCCACCATGAAG, 5'r CACCTTATTCTCCGTGGC

*MHC* human 5'f CCCTCCTCAAAGTGCAGAG, 5'r TCCTTTTTGCCTCGGTCTTA

*MYOG* mouse 5'f CCTTTCCAGGGAGGTAAAGC, 5'r GAGGCCGCGTTATGATAAAA

*P21* 5'f TGTCCAATCCTGGTGATGTCC, 5'r TCAGACACCAGAGTGCAAGAC

*P27* 5' f TTCTTCTGTTCTGTTGGCCC, 5'r GTCTCAGGCAAACCTCTGAGG

*P57* 5'f GCGGCGATCAAGAAGCTGTC, 5'r CCGGTTGCTGCTACATGAAC

*RB* mouse 5'f CACGAATGCAAAGCAGAGA, 5'r ACAACCATGAGCCAGGAGTC

*P8 mouse* 5'f AGGACCTAGGCCTGCTTGAT, 5'r CTCTGCTTCTTGCTCCCATC

*HES1* mouse 5'f AAAGACGGCCTCTGAGCACA, 5'r TCATGGCGTTGATCTGGGTCA

*HES6* mouse 5'f CTCCTGAACCACCTGCTAGAATC, 5'r GGGAGTCCCCCAGCAGAT

*PRMT4* mouse 5'f GCAGCAGAACATGATGCAGG, 5'r GATCGCACGCTGGTAGGTG

*PRMT5* 5'f ATTGCGTCCCCGAAATAGCT, 5' r GCGGATGGAAGACAGGCAT

*COPR5* mouse 5'f GGCTGCAGATCTTTTTAATGAGGA, 5' r CCTGGATGTCATCAGCATCGT

human 5'f TGGAACACAGAGCATTCTAATGA, 5'r TCATCCATGGCAAAGCCTTC

Sequence of the oligonucleotides used for CHIP:

*P21* 5'f TCTCGGAGACCAGCAGCAA, 5'r TGGCAAAGTGGGACGTCCTT

*P57* 5' f TCTGTCAGGCCATGTCGG, 5'r AGTTGGGCCCATCCTAGC

*MYOG* 5'f GAATGCACCCACCCCCTC, 5'r CCCCTCACGCCAACTGCT

*MYOD1* 5'f CCTGGGGCTATTTATCCCCAGGGTAGCC, 5'r TAGACCACTGGAGAGGCTTGGGCAG

*P8* 5'f GTGACAGGAACTGCTGACCA, 5'r AGCCCTGTCTGATGCAATCT

Human primary cells : Human myoblasts, obtained from quadriceps muscle biopsies of a control adult ( "AFM-BTR Banque de tissus pour la recherche" (Hôpital de la Pitié-Salpêtrière, Paris, France) were kindly provided by G Carnac. Human myoblasts were initially prepared, purified and cultured as previously described <sup>1</sup>.

Immunofluorescence studies were performed using an anti-MHC antibody from Santa Cruz (H300) and used as described by the manufacturer.

### Supplementary references

1. Barro, M, Carnac, G, Flavier, S, Mercier, J, Vassetzky, Y and Laoudj-Chenivresse, D, (2010) Myoblasts from affected and non-affected FSHD muscles exhibit morphological differentiation defects. *J Cell Mol Med* 14: 275-89.
2. Milasincic, DJ, Dhawan, J and Farmer, SR, (1996) Anchorage-dependent control of muscle-specific gene expression in C2C12 mouse myoblasts. *In Vitro Cell Dev Biol Anim* 32: 90-9.
